# Supplementary material for: Social Inequalities in Changes in Diet in Adolescents during Confinement Due to COVID-19 in Spain: The DESKcohort Project
Source: MDPI journal article supplement (doi:10.3390/nu13051577), 2021-05-08
Supplement: s1 [file s1]

**Figure S1.** Changes in food consumption and eating behavior among high-school students in Central Catalonia during the confinement due to the COVID-19 pandemic. DESK-COVID project, 2020.

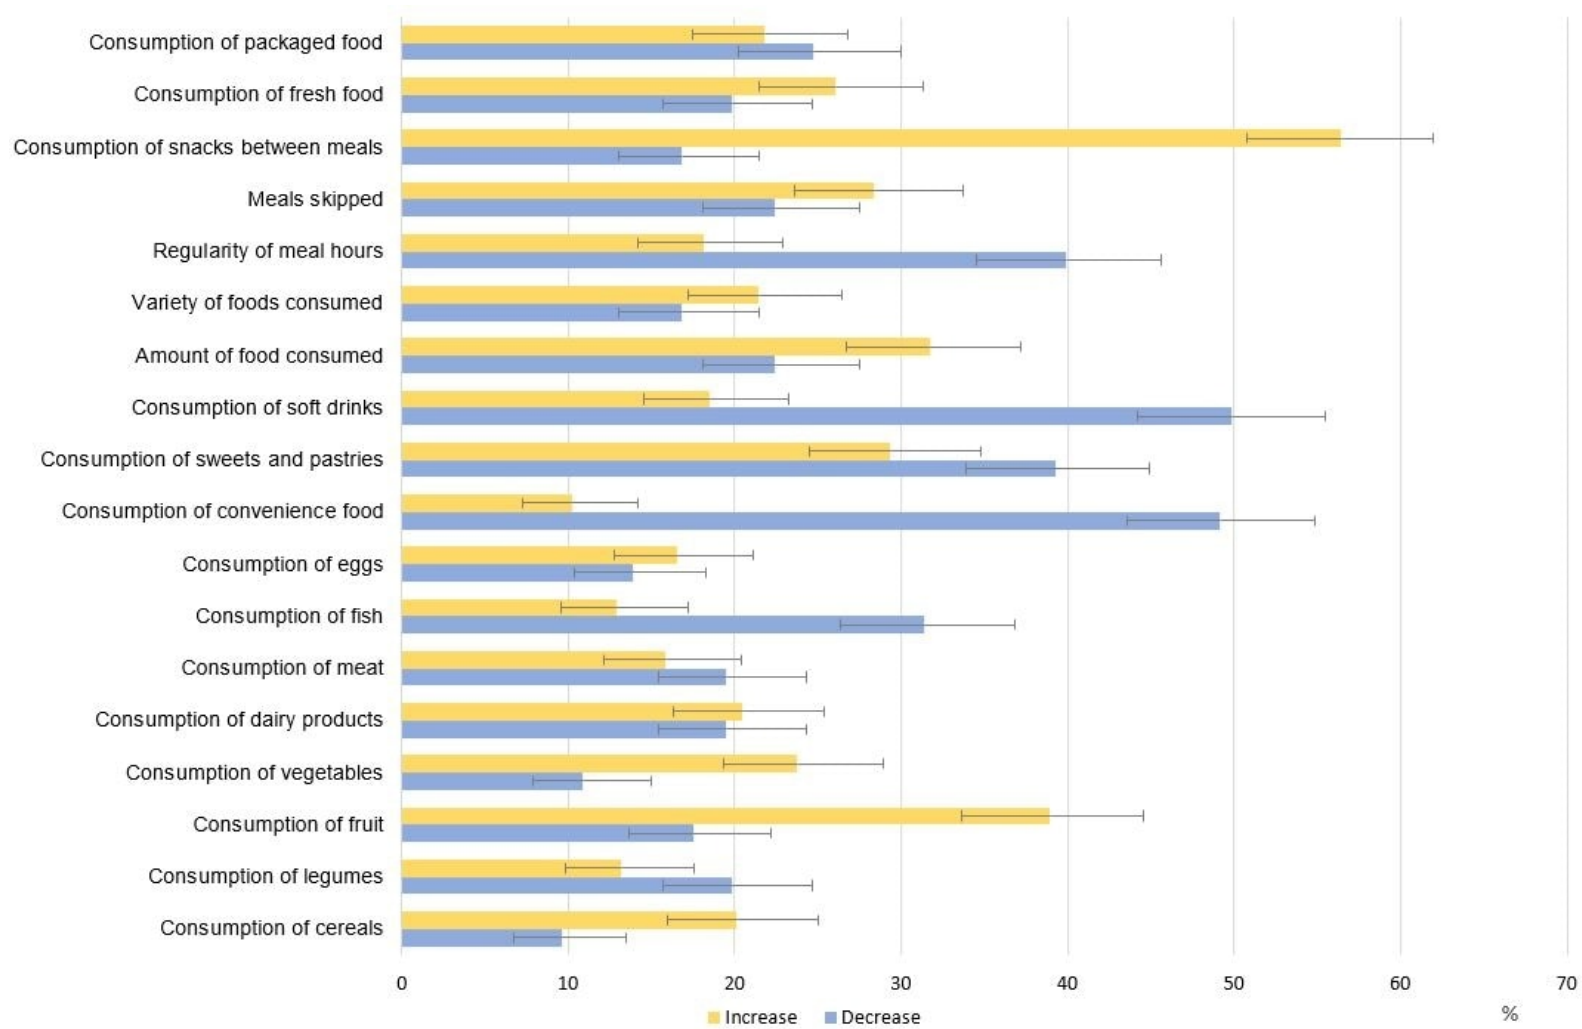

**Figure S2.** Relationship between less healthy eating variables during the COVID-19 confinement and a more disadvantaged socioeconomic position of the high-school students from Central Catalonia. DESK-COVID project, 2020.

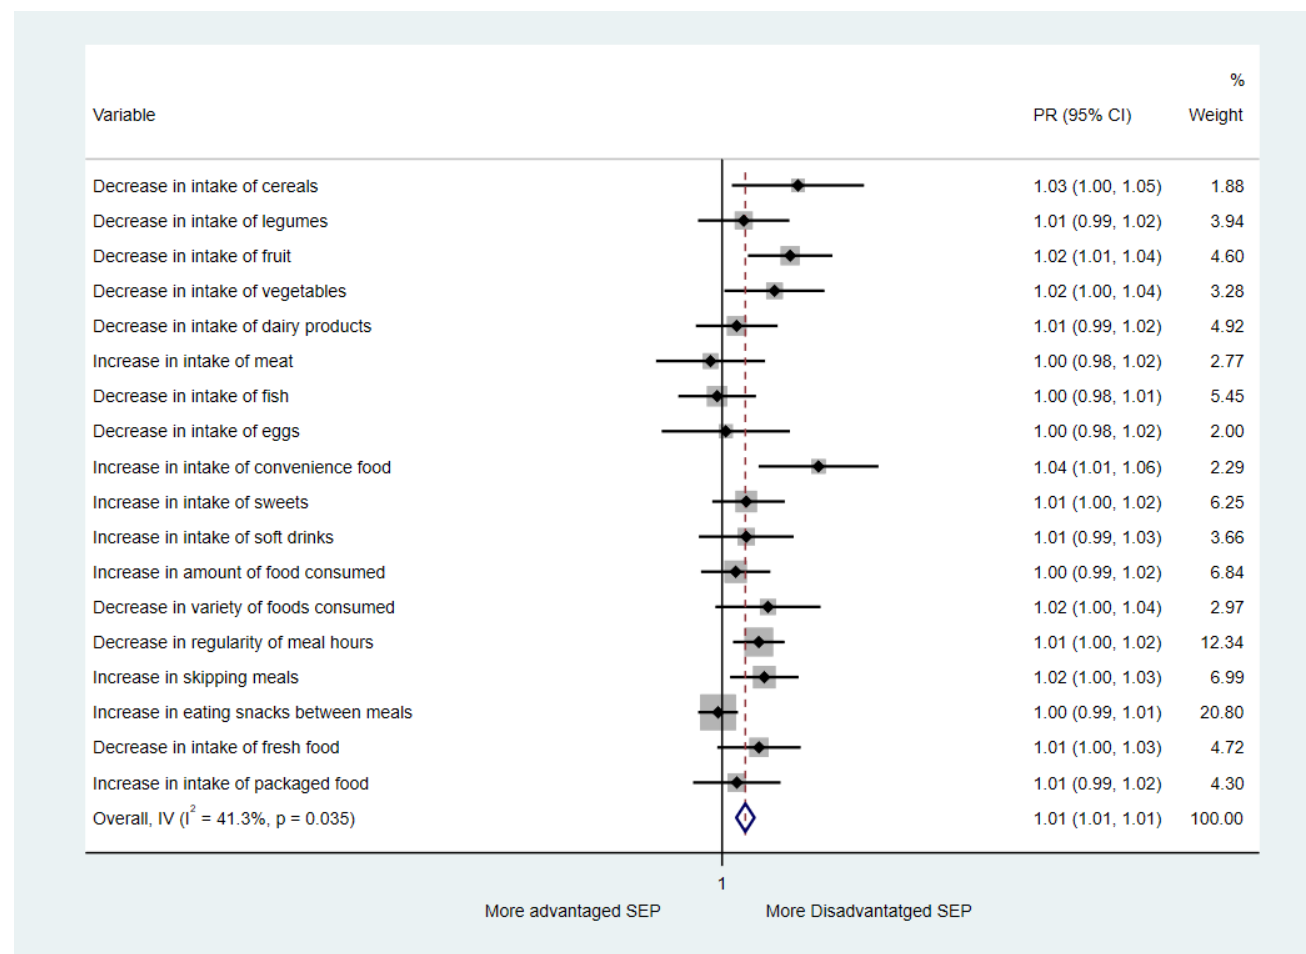

Perceived socioeconomic position has been considered as a continuous variable. Prevalence ratio has been adjusted by sex, age, and self-perceived health status. Abbreviations: PR: Prevalence Ratio; SEP: Socioeconomic Position; IV: Independent Variable; I<sup>2</sup>: I-squared (proportion of total variation in effect estimate due to between-study heterogeneity).
